1 ***When do shifts in trait dynamics precede population declines?***

2 Gaurav Baruah<sup>1</sup>, Christopher F. Clements<sup>1,2</sup>, Frédéric Guillaume<sup>1</sup>, Arpat Ozgul<sup>1</sup>

3

4 <sup>1</sup> Department of Evolutionary Biology and Environmental studies, University of Zurich

5 <sup>2</sup> School of Biosciences, University of Melbourne

6

7

8 \*Corresponding Author: Gaurav Baruah

9 Email: [gaurav.baruah@ieu.uzh.ch](mailto:gaurav.baruah@ieu.uzh.ch)

10

11 Keywords: *population decline, quantitative trait, early warning signals, demography*

12

13 Manuscript type: *Article*

14 Number of words in main-text: 5572

15 Number of words in Abstract: 200

16

## 17 **Abstract**

18 Predicting population responses to environmental change is an on-going challenge in  
19 ecology. Studies investigating the links between fitness-related phenotypic traits and  
20 demography have shown that trait dynamic responses to environmental change can  
21 sometimes precede population dynamic responses, and thus, can be used as an early  
22 warning signal. However, it is still unknown under which ecological and  
23 evolutionary circumstances, shifts in fitness-related traits can precede population  
24 responses to environmental perturbation. Here, we take a trait-based demographic  
25 approach and investigate both trait and population dynamics in a density-regulated  
26 population in response to a gradual change in the environment. We explore the  
27 ecological and evolutionary constraints under which shifts in a fitness-related trait  
28 precedes a decline in population size. We show both analytically and with  
29 experimental data that under medium-to-slow rate of environmental change, shifts  
30 in trait value can precede population decline. We further show the positive influence  
31 of environmental predictability, average reproductive rate, plasticity, and genetic  
32 variation on shifts in trait dynamics preceding potential population declines. These  
33 results still hold under non-constant genetic variation and environmental  
34 stochasticity. Our study highlights ecological and evolutionary circumstances under  
35 which a fitness-related trait can be used as an early warning signal of an impending  
36 population decline.

37

38

## 39 1. Introduction

40 Exogenous pressure can force complex systems with alternative stable states  
41 towards so-called tipping points, the point at which the state system can rapidly and  
42 substantially change in response to a small perturbation (May 1977; Hutchings and  
43 Reynolds 2004; Frank et al. 2011) . Examples of such transitions are documented  
44 from rapid shifts in shrub cover in grasslands (Kéfi et al. 2007) to the collapse of  
45 fisheries (Jackson et al. 2001; Frank et al. 2011), and have been shown to be  
46 experimentally inducible in laboratory systems ( Dai et al. 2012; Lei Dai, Korolev,  
47 and Gore 2013). The non-linear nature of such transitions makes them difficult to  
48 predict, but may be possible through the identification of statistical signals  
49 embedded in time series data, typically termed early warning signals (EWS) (Wissel  
50 1984; Dakos et al. 2008; Marten Scheffer et al. 2009). Such statistical signals arise  
51 from a systems behavior prior to a critical transition (van Nes and Scheffer 2007; M.  
52 Scheffer et al. 2012) – whereby it takes longer to return to it’s original equilibrium  
53 state after every perturbation. This behavior of the system is known as critical  
54 slowing down (CSD).

55 CSD behavior is predicted to lead to increasing variance and autocorrelation in the  
56 abundance time-series in the region of a bifurcation. However, shifts in variance or  
57 autocorrelation in the abundance time series might not be the only indicators of  
58 whether a population is nearing a tipping point (Clements and Ozgul 2016). External  
59 environmental change has been shown to also substantially affect phenotypic trait  
60 distributions along with changes in demography (Traill, Schindler, and Coulson

61 2014; Pigeon et al. 2017). Phenotypic traits, for example body size, are intimately  
62 linked with an individual survival and reproductive success (McNamara & Houston,  
63 2007), vulnerability of a population to extinction and fluctuations in population size  
64 (Olden, Hogan, and Zanden 2007; van Benthem et al. 2017). Changes in body size  
65 have also been shown to influence resilience of food webs to disturbance  
66 (Woodward et al. 2005). Furthermore, recent work has also suggested the inclusion  
67 of body size-based measures of stability, as shifts in body size of diatoms were  
68 detected before a regime shift in a lake ecosystem (Spanbauer et al. 2016). Thus,  
69 tracking shifts in such fitness-related phenotypic trait values might allow us to infer  
70 how stable the population is, which can inform us about an impending population  
71 decline.

72 Empirical observations from experiments and natural populations have shown that  
73 including information from shifts in phenotypic traits such as body size into  
74 abundance-based stability indicators improves the accuracy of predictions of  
75 population collapse (Clements and Ozgul 2016; Clements et al. 2017), but the  
76 circumstances under which doing so is informative is still unknown. The response of  
77 a population to a change in the environment can be a combination of ecological and  
78 evolutionary responses governed by factors such as genetic variation or adaptive  
79 plasticity (Charmantier et al. 2008; Ozgul et al. 2012). Plastic responses to a change  
80 in the environment can be fast, and such responses have been shown to stabilize  
81 population dynamics (Reed et al. 2010; Charmantier et al. 2008). However, if the  
82 environment keeps on changing, populations might deplete its plastic capacity and  
83 standing genetic variation, causing it to eventually decline. This decline in population

84 size will also be dependent on the reproductive rate i.e., whether a population is  
85 growing faster or slower (Hutchings et al. 2012; Juan-Jordá et al. 2015). In addition  
86 to this, due to directional change in the environment, selection on the trait will act on  
87 the standing genetic variation of that trait, and higher the genetic variation faster is  
88 the evolutionary response (assuming the phenotype heritable). Such theoretical  
89 expectations raise important practical questions: can a shift in phenotypic trait  
90 dynamics occur before an eventual decline in population size? Under what  
91 circumstances is this possible? If such a shift in trait dynamics occurs, what are the  
92 factors that govern the earlier occurrence of this shift?

93 To answer these questions, we used a combination of theoretical and experimental  
94 approaches to understand the circumstances under which information from trait  
95 values can be useful to predict a potential population decline. First, we integrated  
96 quantitative genetics and population dynamics in a theoretical approach, and  
97 showed both analytically and numerically whether, and under what circumstances,  
98 shifts in trait dynamics can precede population declines. We then experimentally  
99 test our predictions using microcosm data where replicate protist populations were  
100 forced to collapse under different environmental perturbations (Clements and Ozgul  
101 2016). Finally, we evaluate, through numerical simulations, how genetic variation,  
102 adaptive plasticity, and reproductive rate affect when shifts in trait dynamics  
103 precede decline in population size.

## 104 **2. Methods and modeling framework**

### 105 *2.1 The model*

106 In our model, we consider a closed population that has non-overlapping generations,  
107 and is subjected to density-dependent population regulation. We assume in our  
108 population that all individuals experience the same environment; i.e. there is no  
109 spatial heterogeneity. Fitness of individuals in the population is determined by a  
110 quantitative trait  $z$  that is under stabilizing selection. Under these assumptions the  
111 dynamics of the population and the mean value of the trait can be written as (Chevin  
112 and Lande 2010; Gomulkiewicz and Holt 1995)

$$113 \quad N_{t+1} = N_t \bar{R}_t \quad (1)$$

$$114 \quad \bar{z}_{t+1} = \bar{a}_t + \sigma_a^2 \frac{\partial \ln \bar{W}}{\partial \bar{a}} + bu_t \quad (2)$$

115  $\bar{R}_t$  is the average fitness of the population at generation  $t$ .  $\bar{z}_{t+1}$  is the mean value of  
116 the trait at generation  $t+1$ ,  $\bar{a}_t$  is the mean breeding value of the population at  
117 generation  $t$ ,  $\sigma_a^2$  is the additive genetic variance,  $\frac{\partial \ln \bar{W}}{\partial \bar{a}}$  is the gradient of selection on  
118 the mean trait  $\bar{z}$ ,  $\bar{W}$  is the mean fitness due to the trait  $z$  and  $bu_t$  quantifies the  
119 average plastic response of the trait (Table 1).

120  $\bar{R}$  in equation (1) can be expanded as :

$$121 \quad \bar{R} = \int R(z)p(z)dz \quad (3)$$

122 where  $R(z)$  is the absolute multiplicative fitness of an individual with trait  $z$  and  $p(z)$   
123 is the distribution of the quantitative trait  $z$  which is normal.  $R(z)$  can further be  
124 decomposed into:

$$125 \quad R(z) = R_0^{\left(1 - \frac{f(N_t)}{f(K)}\right)} W(z) \quad (4)$$

126 where,  $R_0$  is the net reproductive rate,  $\frac{f(N_t)}{f(K)}$  is the density dependence function  
127 and  $W(z)$  is the Gaussian stabilizing fitness function given as  $W(z, \theta) = e^{-(z-\theta)^2/2w_z^2}$   
128 with width  $w_z^2$  and optimum phenotype of  $\theta$ . Hence an individual's reproductive  
129 fitness will thus be determined not only by how far its trait  $z$  is from the optimum  
130 phenotype  $\theta$ , but will also concurrently be dependent on the current density of the  
131 population given by the density-dependence function.

132 Finally, the response of the primary trait  $z$  to the environment is modeled using  
133 linear reaction norms (Gavrilets and Scheiner 1993). The phenotype of an individual  
134 at any generation  $t$  in the population is given by

$$135 \quad z_i = a_i + bu + \epsilon \quad (5)$$

136 where  $a$  is the breeding value of the individual  $i$ , which is normally distributed with  
137 mean  $\bar{a}$  and additive genetic variance of  $\sigma_a^2$ .  $\epsilon$  is the residual component with mean 0  
138 and variance  $\sigma_\epsilon^2$ . The slope  $b$  in our model determines how plastic the trait is and is  
139 modeled as a constant value meaning that plasticity in the trait cannot evolve.

140 Hence, variance of the phenotype  $z$  is  $\sigma_z^2 = \sigma_a^2 + \sigma_\epsilon^2$  (we assume  $\sigma_\epsilon^2$  to be zero in our  
141 model). The environment in our model determines the optimal phenotypic  
142 value  $\theta$  for the primary phenotype  $z$  and also cues the plastic response.  $\theta$  is assumed  
143 to be linearly dependent on the environment  $E$  that selects for a particular  
144 phenotypic value such that at any time  $t$ ,  $\theta_t = BE_t$ . The environmental cue  
145  $u$  quantifies how an individual on average perceives the environment. For example,  
146 snow cover could be one of the environmental cues for ground squirrels to come out  
147 of their hibernation that correlates with resource availability, the environmental

148 factor (Lane et al. 2012). This means that the cue  $u_t$  and the selecting environment  
149  $E_t$  are related (Charmantier et al. 2008; Reed et al. 2010). We model this relation by  
150 making the environmental cue a function of the selecting environment such  
151 that  $u_t = f(E_t)$ . In the case when  $u_t$  is a linear function of the selecting environment  
152  $E_t$ , changes in the selecting environment triggers a change in the cue response. If  
153  $u_t$  is modeled as a constant value and independent of the selecting environment  $E_t$ ,  
154 then the cue response will be different to the change in the selecting environment. In  
155 this case, individuals in the population will not be able to perceive changes in the  
156 selecting environment.

157 Finally we can arrive at equation (2), which describes the dynamical changes in the  
158 mean trait due to changes in the mean fitness  $\bar{W}$  caused by changes in the selecting  
159 environment  $E_t$ . The mean fitness  $\bar{W}$  can be calculated by:  $\bar{W} = \int W(z)p(z)dz =$

160 
$$\sqrt{\frac{w_z^2}{\sigma_z^2 + w_z^2}} e^{-(\bar{z}_t - \theta_t)^2 / 2(w_z^2 + \sigma_z^2)}$$

161 In our model we specifically address questions linked with the decline phase of the  
162 population and not evolutionary rescue. Evolutionary rescue is a long-term process,  
163 which occurs when genetic evolution rescues a population from extinction in  
164 response to changes in the environment. Whether this rescue happens will depend  
165 on the initial decline phase of the population, as the population might collapse before  
166 it can adapt to changing environmental conditions (Gonzalez et al. 2013). Hence,  
167 predicting this initial decline phase is of foremost importance if one has to mitigate  
168 the demographic response of the population, before evolutionary rescue takes place  
169 at a later phase.



170 2.1 Analytical framework:

171 Optimal phenotypic change in our analyses is directional and given by:

172

173 
$$\theta_t = \begin{cases} B & , t < t_{500} \\ B E_t = B e^{-\left(\frac{t}{500}C+C\right)} & , t \geq t_{500} \end{cases} \quad (6)$$

174

175 Where  $B = 2$ ,  $E_t = e^{-\left(\frac{t}{500}C+C\right)}$ ,  $t$  is the time in generations and  $C$  is a parameter that

176 controls how fast the optimal phenotype changes over time. We vary  $C$  over a range

177 of values to create a gradient of environmental change from fast to slow. Without

178 loss of generality, we consider that the average trait value is at its optimum, i.e.

179  $\bar{z} = \theta_0 = B$  and the environment shifts at  $t = 500$ .

180 Following an environmental change scenario, shifts in trait and population dynamics

181 are calculated by  $\frac{(\bar{z}_0 - \bar{z}_t)}{\bar{z}_0}$  and  $\frac{(N_0 - N_t)}{N_0}$  respectively, where  $\bar{z}_0$  is the initial average trait

182 value and  $\bar{z}_t$  is the average trait value after the optimum phenotype shifts.  $N_0$  is the

183 abundance at carrying capacity and  $N_t$  is the abundance after the environment shifts.

184 We consider in the analytical cases below without the effect of plasticity, i.e.  $b = 0$

185 (appendix A2 for plasticity affect). Hence, all the individuals in the population differ

186 only in terms of their breeding value. For analytical simplicity, we show two very

187 simplistic cases of one-generation change in trait and the population after the

188 optimum environment shifts. *Case 1*: the environmental change scenario that causes

189  $\frac{(\bar{z}_0 - \bar{z}_1)}{\bar{z}_0} > \frac{(N_0 - N_1)}{N_0}$  i.e., shift in trait value before population decline and, *Case 2*: the

190 environmental change scenario that causes  $\frac{(\bar{z}_0 - \bar{z}_1)}{\bar{z}_0} < \frac{(N_0 - N_1)}{N_0}$  i.e., shift in trait value  
191 after a population decline. We consider in the above cases two extreme ends of  
192 environmental change: abrupt, large shift in one generation and slow, small shift in  
193 one generation. In the case of abrupt and large shift in the environment, the  
194 optimum phenotype is allowed to shift in *one generation* by a large magnitude to a  
195 new value of  $\theta_1 = 0.5$  from a value of  $\theta_0 = 2$  such that,  $\delta = (\theta_0 - \theta_1) = (\bar{z} - \theta_1) =$   
196 1.5. Specifically,  $\delta$  can be termed as the initial phenotypic lag of the mean trait to  
197 optimum phenotype in 1 generation. The level of this lag is dependent on how fast  
198 the optimum phenotype shifts. A shift of  $\delta \geq 1.5$ , or a lag of 1.5 in just *one generation*  
199 causes a substantial population decline (Fig. 1). Moreover, such a jump in the  
200 optimum phenotype to a new value introduces a novel optimum that is beyond the  
201 distribution of the adapted trait distribution (with  $\sigma_a^2 = 0.5$ ). In the case of slow and  
202 small shift in the environment, the optimum phenotype in *one generation* is allowed  
203 to shift by a very small amount,  $\delta \leq 0.2$ . This value corresponds to a shift in the  
204 optimum that is not novel and within the realms of the adapted trait distribution.  
205 We discuss the analytical results of case 1 and case 2 in the *Result* section.

## 206 *2.2 Numerical simulations*

207 We performed deterministic numerical simulations of the model described above.  
208 We also did stochastic numerical simulations of the model (for details see appendix  
209 A3). Dynamics of the trait, population and optimum environment were iteratively  
210 updated using equations (1-6). We used Gompertz density function as the form of  
211 density-dependence in our model simulations (Chevin and Lande 2010; Gompertz

1825). Without loss of generality, we assumed that the mean trait value is at its  
optimum  $\bar{z} = \theta = B$  at the start of each simulation. Environmental change was  
introduced only after the population has reached its carrying capacity which was at  $t$   
 $=500$ . By varying the parameter  $C$  (equation 6), we simulated a range of  
environmental change scenarios: from very slow ( $C=10.5$ ) to fast ( $C=120.5$ ). In all of  
our simulations of different rates of environmental change, the optimum  
environment switched to a new value at  $t = 500$ . The magnitude of this switch,  
however, depended on  $C$  (equation 6). For example, if  $C=20.5$ , the optimum took  
around  $\sim 30$  generations to switch by a magnitude of 1.5 units and if  $C=120.5$ , the  
optimum took just  $\sim 5$  generations to switch. Next, to quantify whether the trait or  
population abundance shifted first when the environmental conditions changed, we  
calculated the area under the curves (AUC) of both the trait shift  $\frac{(\bar{z}_0 - \bar{z}_t)}{z_0}$  and  
population shift  $\frac{(N_0 - N_t)}{N_0}$  over 20 generations after the optimum environment  
changed. 1-generation change was used only in the two extreme cases to elucidate  
the mathematical simplicity behind the environmental change scenario under which  
trait could shift before a potential population decline. AUC, on the other hand, was  
used to graphically extend the analytical results of 1-generation change to 20-  
generation change. AUC quantified both the magnitude and the timing of  
standardized shifts. With this, we then calculated the metric,  $\Delta shift = (\text{AUC of shift in}$   
 $\text{mean value of the trait} - \text{AUC of population abundance shift})$ . We then compared the  
size of  $\Delta shift$  to the rate of change in the environment (for stochastic change in the  
environment see appendix A3). If  $\Delta shift$  was negative, for a particular rate of change

234 in the environment, it indicated that the population shift was larger and hence the  
235 population declined/shifted earlier than a shift in the mean trait value; if  $\Delta shift$  was  
236 positive it meant a shift in the trait value occurred before a decline/shift in  
237 population size. This allowed us to quantify under what environmental change  
238 scenarios (from slow to fast) we could expect shift in average trait value to occur  
239 before a potential population decline. We then evaluated how the metric  $\Delta shift$ , for  
240 the range of environmental change scenarios, was affected by factors like genetic  
241 variation, strength in plasticity, reproductive rate, and environmental predictability.  
242 In the appendix we show how relaxing the assumptions of constant genetic variation  
243 (appendix A4) and stochastic environmental change (appendix A3) affect  $\Delta shift$ .

#### 244 *2.2.1 Rate of environmental change*

245 We varied the parameter  $C$  from a value of 10.5 to 120.5 with a step size of 2 to  
246 simulate a gradient of perturbations from slow to fast environmental change. We  
247 then calculated from equation (6) the time in generations the optimum took to shift  
248 by a magnitude of  $\sim 1.5$  units. This  $\sim 1.5$  unit of change in the optimum in 5  
249 generations (when,  $C=120.5$ ) or in more than  $\sim 30$  generations (values of  $C \leq 30$ )  
250 was enough to cause a significant population decline (Fig. 1). We then assessed how  
251  $\Delta shift$  was affected by the rate of environmental change.

#### 252 *2.2.2 Environmental predictability*

253 We simulated two specific scenarios: 1) when the cue was a linear function of the  
254 optimum environment, and hence individuals of the population could perfectly

255 predict changes in the optimum environment, 2) when the cue was a constant value  
256 and hence individuals had zero predictability of changes in the optimum  
257 environment. We then assessed how these two scenarios of environmental  
258 predictability affected  $\Delta shift$ .

### 259 *2.2.3 Genetic variation, strength of adaptive plasticity and average reproductive rate*

260 We ran a range of numerical simulations with different levels of genetic variation  
261 (low to high):  $\sigma_a^2 = 0.05, 0.08, 0.1, 0.2, 0.3, 0.4, 0.5, 0.6$ ; low to high strength of  
262 adaptive plasticity  $b = 0.05, 0.1, 0.2, 0.3, 0.4, 0.5, 0.6$ ; and low to high average  
263 reproductive rate  $R_0 = 1.1, 1.15, 1.2, 1.25, 1.3, 1.35, 1.5$ . While varying levels of  
264 genetic variation from low to high, we kept adaptive plasticity strength at  $b = 0.2$  and  
265  $R_0$  at 1.2. While varying levels of  $b$ , we kept  $\sigma_a^2$  at 0.5 and  $R_0$  at 1.2. Finally, while  
266 varying  $R_0$ , we kept  $\sigma_a^2$  and  $b$  at 0.5 and 0.2 respectively. For a range of  
267 environmental change scenarios, we then evaluated the effect of each parameter  
268 value on  $\Delta shift$ .

### 269 *2.2.4 Stochasticity in optimum phenotypic change*

270 All of the simulations and calculations of  $\Delta shift$  in the above sections were  
271 deterministic. However, any recorded environmental parameter in nature, always  
272 fluctuates around a mean expectation over time (García Molinos and Donohue  
273 2011). We thus wanted to assess whether adding stochasticity to the changes in the  
274 optimum affected our deterministic simulation results. We redid the numerical  
275 simulations of the above theoretical model but added stochasticity in the optimum  
276 phenotypic change (for stochasticity in the growth rate, see appendix A8). For details

277 see appendix A3. We then assessed how  $\Delta shift$  performed under stochasticity in  
278 optimum phenotypic change and how the abovementioned factors affected  $\Delta shift$ .

### 279 *2.2.5 Changing genetic variance*

280 All of the above simulations were done assuming that genetic variation remained  
281 constant. This is true when a quantitative genetic trait was assumed to be controlled  
282 by infinite number of loci (Falconer and Mackay 1996). Here, we took into account  
283 the decreases in genetic variation that might occur due to directional change of the  
284 optimum phenotype. For an asexually reproducing population, the variance of the  
285 distribution of the breeding values was given by the equation (Bürger 2000):

$$286 \quad \Delta\sigma_a^2 = -\left(\frac{\sigma_a^4}{\sigma_a^2 + w_z^2}\right) \quad (7)$$

287 We used numerical iteration to solve the change in genetic variation over time using  
288 equation (7). We repeated all the simulations above and varied the levels of  
289 plasticity, reproductive rate, starting genetic variation, and environmental  
290 predictability, and calculated  $\Delta shift$  as before (appendix A4).

### 291 *2.5.6. EWS*

292 We evaluated how shifts in EWS compared with shifts in mean trait in response to  
293 changes in the environment. First, we showed that our model exhibits non-  
294 catastrophic transcritical bifurcation (appendix A6). Next, we estimated standard  
295 deviation and autocorrelation at first-lag from abundance data as two main EWS  
296 indicators. Following this, shifts in EWSs and shifts in mean trait value were  
297 compared by calculating a metric called  $\Delta shift_{ews}$  (appendix A6.4-A7). We evaluated

298  $\Delta shift_{ews}$  for different levels of plasticity, genetic variation and reproductive rate.  
299 Furthermore, we modified our model to allow for catastrophic fold bifurcation by  
300 introducing an allee threshold at equation 2 (Dai et al. 2012; Hilker 2010). Similarly,  
301 for this fold-bifurcation model we evaluated  $\Delta shift_{ews}$  (see appendix A6-A7 for  
302 details).

### 303 *2.3 Experimental Data*

304 In addition, we analyzed an experimental data where microcosm populations were  
305 forced to collapse by varying the rate of decline in food availability (Clements &  
306 Ozgul, 2016). Clements & Ozgul (2016) used replicate populations of protozoan  
307 ciliate *Didinium nasutum* that fed on *Paramecium caudatum*. In the experiment, four  
308 different treatments of rates of decline of prey availability were chosen: 1) fast; 2)  
309 medium; 3) slow, as well as a constant prey availability as the control treatment. A  
310 total of 60 replicate populations, 15 per treatment were used for the experiment. In  
311 our study, we used data only from the deteriorating environment treatments (i.e.,  
312 fast, medium and slow decline in prey availability). We analyzed each population's  
313 abundance and mean body size time series independently. We then calculated AUC  
314 and  $\Delta shift$  to qualitatively verify our theoretical simulation results (see appendix A5  
315 for details).

## 316 **3. Results**

### 317 *3.1 Analytical results*

318 Before a shift in the optimum environment occurred, we assume that the population  
 319 is perfectly adapted to its optimum phenotype  $(\theta - \bar{z}) = 0$ . Considering the starting  
 320 population size to be at  $K$  with no plasticity ( $b = 0$ ), equilibrium population size at  
 321 any time  $t$  from equation (1), (3) and (4) is

$$322 \quad N = \frac{w_z}{\sqrt{w_z^2 + \sigma_z^2}} K \text{ (appendix A1)}$$

323 *Case #1: Population declines before a trait shift:*

324 Let  $N_0 = \frac{w_z}{\sqrt{w_z^2 + \sigma_z^2}} K$  be the population size when the population is at its equilibrium.

325 Next, when the environment changes by a large magnitude in one generation such  
 326 that  $\delta \geq 1.5$ , the standardized population shift in one generation is (appendix A1):

$$\frac{N_0 - N_1}{N_0} = \frac{N_0 - N_0 e^{-\frac{(\delta)^2}{2w_z^2 + 2\sigma_z^2}}}{N_0} = 1 - e^{-\frac{(\delta)^2}{2w_z^2 + 2\sigma_z^2}} > 0;$$

327 and,  $1 - e^{-\frac{(\delta)^2}{2w_z^2 + 2\sigma_z^2}} > \frac{(\bar{z}_0 - \bar{z}_1)}{\bar{z}_0}$

328 *Case #2: Trait shifts before population decline:*

329 When the environment shifts by a small magnitude such that:  $\delta \leq 0.2$  in one  
 330 generation. The standardized population shift becomes (appendix A1):

$$\frac{N_0 - N_0 e^{-\frac{(\delta)^2}{2w_z^2 + 2\sigma_z^2}}}{N_0} = \frac{N_0 - N_0}{N_0} \approx 0,$$

331 because,  $e^{-\frac{(\delta)^2}{2w_z^2 + 2\sigma_z^2}} \approx 1$  as  $\delta$  is very low conditional to the fact that  $w_z^2 \gg \sigma_z^2$ .



332 In this case, proportional shift in a trait is greater than zero and hence greater than  
333 the population shift (see appendix A1).

$$334 \frac{(\bar{z}_0 - \bar{z}_1)}{\bar{z}_0} = \frac{(\theta_1 - \bar{z}_0) \left( \frac{w_z \sigma_a^2 \gamma}{\sigma_z^2 + w_z^2} \right)}{\bar{z}_0} > \frac{N_0 - N_t}{N_0} \approx 0$$

335 Our two extreme analytical cases showed that, if the optimum phenotype shifted by  
336 a large magnitude in just one generation, the decline in population size preceded  
337 shift in mean trait value immediately. However, this was not true in the scenario  
338 when the optimum shifts by a very small magnitude over the course of a single  
339 generation.

340 For the effect of adaptive plasticity see appendix A2.

### 341 *3.2 Simulation results*

#### 342 *3.2.1 Environmental predictability*

343 Higher predictability of the optimum phenotypic change caused  $\Delta shift$  to be positive  
344 when compared with lower predictability (Fig. 2). Low predictability of the optimum  
345 phenotypic change caused  $\Delta shift$  to be negative even when the optimum phenotype  
346 shifts by a magnitude of  $\sim 1.5$  units in more than 15 generations (slow  
347 environmental shift) (Fig. 2).

#### 348 *3.2.2 Genetic variation*

349 Higher genetic variation  $\sigma_a^2$  caused  $\Delta shift$  to be positive but this happened when the  
350 optimum environment shifted by a magnitude of 1.5 units in more than 15  
351 generations (slow environmental shift) (Fig. 3C). If the optimum environment

352 shifted to a new value by a magnitude of 1.5 units in less than 15 generations (fast  
353 shift), population size always declined before any visible shift in the trait value.

### 354 *3.2.3 Adaptive plasticity*

355 Values of plasticity ( $b > 0.2$ ) caused  $\Delta shift$  to be positive (i.e., trait shifted earlier than  
356 population decline) even when the optimum shifted by a magnitude of 1.5 units in  
357 less than 15 generations (fast shift) (Fig. 3B). However, for lower values of plasticity  
358 ( $b < 0.2$ ), earlier shift in trait value would occur before the population declined only  
359 when the optimum environment shifted slowly ( $>15$  generations) (Fig. 3B).

### 360 *3.2.4 Reproductive rate*

361 For  $R_0$  of 1.2, trait shift occurred earlier than decline in population size i.e.,  $\Delta shift > 0$ ,  
362 given the optimum phenotype shifted slowly (by a magnitude of 1.5 units in  $\sim 15$   
363 generations or more). If the optimum phenotype shifted faster than that, average  
364 reproductive rate should have to be higher than 1.2 for  $\Delta shift > 0$  and hence shift in  
365 the trait value would then be informative of a population decline (Fig. 3A).

### 366 *3.2.5 Stochastic change in the optimum phenotype*

367 Higher  $\sigma_a^2$ , higher  $b$ , higher environmental predictability, and higher  $R_0$  substantially  
368 caused  $\Delta shift$  to be positive for this particular scenario (see appendix A3).

### 369 *3.2.6 Evolving genetic variation*

370 In comparison to simulations with constant genetic variation,  $\Delta shift$  was smaller  
371 (less positive) for simulations where genetic variation evolved over time. In other  
372 words,  $\Delta shift_{constant\ variation} > \Delta shift_{evolving\ variation}$  (see appendix A4).

### 373 3.2.7 EWS and shift in mean trait

374 We found that for both transcritical and fold-bifurcation models, shifts in mean trait  
375 could occur significantly before shifts in the two EWS indicators (Appendix A6-A7).  
376 This was particularly evident for medium to slow changes in the environment (Fig  
377 A13-A16).

### 378 3.3 Experimental results

379 Experimental data supported our analytical and simulation results qualitatively.  
380 Decline in prey availability from ~300 individuals of *P. caudatum* to zero happened  
381 over a period of 10, 15 and 20 days indicating three different rates: fast, medium and  
382 slow change in the environment respectively. Fast change in prey availability  
383 resulted in population decline preceding shift in mean body size in 7 out of 9  
384 replicates (Fig. 4A). However, during medium rate of prey decline, shift in average  
385 body size preceded decline in population size in 7 out 9 replicate populations in and  
386 4 out of 7 in slow decline in prey availability, qualitatively proving our analytical as  
387 well as our simulation results correct (Fig. 4A).

## 388 4. Discussion

389 Predicting the fate of populations in response to environmental change is a key  
390 challenge in ecology. Recently developed methods have suggested that tracking

391 fitness related traits might help achieve this goal (Clements and Ozgul 2016;  
392 Clements et al. 2017). Our analytical and simulation results suggested that when the  
393 optimum environment changes relatively slowly, shifts in average trait value may  
394 occur earlier than shifts in the population abundance. However, this was affected by  
395 the amount of genetic variation, strength in adaptive plasticity, environmental  
396 predictability, and speed of life history.

397 In our simulations, due to higher adaptive plasticity ( $b > 0.3$ ), shifts in the average  
398 trait value occurred before a decline in population size in response to a fast change  
399 in the optimum environment (i.e., shift of 1.5 magnitude by the optimum  
400 environment in less than 15 generations)(Fig. 3B, Fig. A2). Such a result was  
401 dependent on how predictable the environment was, as plastic response of the trait  
402 was mediated by how well the cue was related to a change in the optimum  
403 environment. If the cue was a function of the selecting environment, very high  
404 adaptive plasticity ( $b = 0.5$ ) would then lead to a shift in average trait value before a  
405 decline in population size was observed even during a significant fast shift in the  
406 optimum phenotype (Fig. 3B,  $b = 0.5$ ).

407 While the positive influence of higher genetic variation on population persistence  
408 (Willi and Hoffmann 2009) and evolutionary rescue (Hufbauer et al. 2015;  
409 Gomulkiewicz, Krone, and Remien 2017) is relatively well studied, little is known  
410 about its transient effect on shifts in average trait value in response to changes in  
411 the optimum environment. Our result suggest that in response to a relatively slow  
412 directional change in the environment, high and constant genetic variation in a

413 fitness-related trait will promote faster evolution in the average trait value and  
414 consequently will cause a faster shift in the average trait value before a decline in  
415 population size (Fig. 3C, Fig. A3). In addition, additive genetic variance is also  
416 expected to decrease over time due to directional selection acting on the trait  
417 (Barton and Keightley 2002). Here, in addition to the simulations with constant  
418 genetic variation, we carried out a set of simulations where we relaxed the  
419 assumption of constant genetic variation, and this slowed evolutionary change due  
420 to the depletion of genetic variation caused by directional selection (Fig. A6). For this  
421 reason, the magnitude of shift in average trait value was smaller and slower when  
422 compared with another trait shift under the assumption of constant genetic variation  
423 for the same scenarios of optimum environmental change (see appendix Fig. A6, A7).  
424 Besides directional selection, a decline in population size can also lead to a decrease  
425 in genetic variance (Ashander, Chevin, and Baskett 2016). Irrespective of the cause,  
426 low genetic variance will impede both evolutionary rescue (Hufbauer et al. 2015;  
427 Gomulkiewicz, Krone, and Remien 2017) as well as the predictability of population  
428 decline with the help of trait information.

429 Deterministic and stochastic modeling of population persistence in response to a  
430 changing environment had earlier revealed the positive affect of reproductive rate  
431 on influencing adaptation (Yvonne and Hoffmann 2009). Earlier studies have also  
432 reported that larger species tend to decline in population size more rapidly than  
433 smaller species (Olden, Hogan, and Zanden 2007; Collette et al. 2011) due to  
434 differences in life-history strategies and intrinsic growth rates between large and  
435 small organisms (Hutchings et al. 2012). Populations of fish with slow life histories

436 (in the family Scombridae) declined faster than those which had comparatively  
437 faster speed of life history (Juan-Jordá et al. 2015). Our modeling results also  
438 reiterated that during a fast shift in the environment (shift of the optimum  
439 environment by 1.5 units in <15 generations), slow growing populations ( $R_0 < 1.2$ )  
440 would decline before a shift in the average trait value could be observed (Fig. 3A).  
441 When we compared two populations with different reproductive rates, the  
442 magnitude of  $\Delta shift$  was found to be substantially larger for populations with higher  
443  $R_0$  for a same rate of environmental shift (Fig. 3A, Fig. A9), due to the rapid declines  
444 of the populations with lower  $R_0$ .

445 Our results also suggested that environmental predictability (the correlation  
446 between the cue and the optimum environment) was a key factor in determining the  
447 earlier occurrence of a shift in the average trait value in response to a change in the  
448 optimum environment. Such environmental predictability acted as an interactive  
449 factor, determining the speed and magnitude of shifts in trait value, which was  
450 driven particularly by the strength in plasticity. Earlier studies had also indicated the  
451 positive interactive effects of environmental predictability and adaptive plasticity on  
452 population dynamics (Reed et al. 2010; Ashander, Chevin, and Baskett 2016).

453 Introducing stochasticity in the change in the optimum phenotype or in the growth  
454 rate (appendix A8) did not change our above results substantially (Fig. A4). In the  
455 case of stochastic change in the optimum phenotype, environmental predictability  
456 was particularly essential as the plastic response of the trait tracked the changes in  
457 the optimum which led to an earlier trait shift before the population declined  
458 (Fig.4B, Fig. A4).

459 EWS are shown to exist in models showing both non-catastrophic and catastrophic  
460 transitions (Kéfi et al. 2013). In relation to this, our results suggest that regardless of  
461 whether our model exhibited non-catastrophic transcritical or catastrophic fold  
462 bifurcation, shifts in mean trait value could occur before shifts in EWS. This was  
463 particularly evident for medium to slow change in the optimum environment  
464 (FigA10-A16). Such a shift in mean trait value occurring before EWS, was however  
465 slightly sensitive to variation in plasticity, genetic variation and net reproductive  
466 rate. Nevertheless, shift in mean trait value in conjunction with shift in EWS could be  
467 used as an indicator of imminent population declines (Clements and Ozgul 2016).

468 Our analytical and simulation results were qualitatively supported by experimental  
469 data (Fig. 4A). In both medium and slow decline in prey availability treatments,  
470 shifts in body size occurred before decline in population size. Shifts in body size in  
471 response to decline in prey availability that were seen in the experimental data could  
472 mostly be attributed to plasticity in body size, as the experimental population was  
473 clonal. During fast decline in prey availability, the plastic response of body size over  
474 time was not large enough to keep up with the pace of decline in prey availability  
475 and hence could not stabilize the loss in fitness. This led to rapid decline in  
476 population size before a significant body size shift. However, during medium decline  
477 in prey availability, plastic shift in body size was able to track the decline in prey  
478 availability in consequence of which a positive growth rate was maintained.

479 However, since the decline in prey availability continued, the plastic capacity of body  
480 size in the population was depleted causing the population to eventually decline,  
481 which was later than shift in body size was observed. In case of slow decline in prey

482 availability, the change was very slow that led to small plastic shifts in body size  
483 before a decline in abundance was seen. These small shifts in body size were not  
484 large enough in comparison to decline in abundance, which was reflected in some of  
485 the replicates. Shifts in body size thus could be an obvious indicator of  
486 environmental deterioration before a response in the population dynamics could be  
487 observed. Whether a trait could be considered as an additional indicator of how  
488 stressed a population is, would depend not only on the identity of the trait but also  
489 on the kind of environmental forcing.

490 The results that we presented here were specific to the parameter space, but were  
491 not restricted to any specific model system (see Chevin, Lande, and Mace 2010). In  
492 our model, we made two main assumptions. Firstly, adaptive plasticity in our trait  
493 remained constant and hence could not evolve. Studies have observed adaptive  
494 phenotypic change without being able to attribute it to genetic change (Ghalambor et  
495 al. 2007; Hendry, Farrugia, and Kinnison 2008). Our results, under the assumption of  
496 constant adaptive plasticity, still held since we explicitly dealt with transient  
497 dynamics after the optimum environment shifted. Secondly, we assumed linear  
498 reaction norms. Nonlinear reaction norms are modeled for secondary traits that are  
499 components of fitness, but such nonlinear reaction norms can evolve to linear ones  
500 in the long term (Gavrilets and Scheiner 1993).

501 In conclusion, we show that shifts in average trait value could precede shifts in EWS  
502 and population declines in response to a change in the optimum environment, and  
503 higher levels of genetic variation, adaptive plasticity, environmental predictability,



504 and reproductive rate strengthened such an earlier shift in the average trait value.  
505 Using an experimental data we also showed that shifts in average body size could  
506 precede declines in population size, and hence could be indicative of a future  
507 population decline. Such a shift in mean body size preceding a decline in population  
508 size was possible if the change in the optimum environment was not fast relative to  
509 the generation time of the organism. Thus, shifts in traits may be useful for  
510 predicting population collapses in species where life histories are fast, the rate of  
511 change of the environment is relatively slow, and the environmental predictability is  
512 relatively high, giving hope that methods can be developed that for these signals in  
513 real world populations.

## 514 **5. Acknowledgements**

515 This research was supported by the European Research Council Grant #337785 and  
516 the Swiss National Science Foundation Grant #31003A\_146445 to xx.

## 517 **6. References**

- 518 Ashander, Jaime, Luis-Miguel Chevin, and Marissa L. Baskett. 2016. 'Predicting  
519 Evolutionary Rescue via Evolving Plasticity in Stochastic Environments'.  
520 *Proceedings of the Royal Society B: Biological Sciences*.  
521 doi:10.1098/rspb.2016.1690.
- 522 Barton, N H, and P D Keightley. 2002. 'Understanding Quantitative Genetic Variation.'  
523 *Nature Reviews. Genetics* 3 (1): 11–21. doi:10.1038/nrg700.
- 524 Bürger, R. (Reinhard). 2000. *The Mathematical Theory of Selection, Recombination,*  
525 *and Mutation*. Wiley.
- 526 Charmantier, Anne, Robin H. McCleery, Lionel R. Cole, Chris Perrins, Loeske E. B.  
527 Kruuk, and Ben C. Sheldon. 2008. 'Adaptive Phenotypic Plasticity in Response to  
528 Climate Change in a Wild Bird Population.' *Science (New York, N.Y.)* 320 (5877):  
529 800–803. doi:10.1126/science.1157174.

- 530 Chevin, and Lande. 2010. 'When Do Adaptive Plasticity and Genetic Evolution  
531 Prevent Extinction of a Density-Regulated Population?' *Evolution* 64 (4): 1143–  
532 50. doi:10.1111/j.1558-5646.2009.00875.x.
- 533 Chevin, Luis Miguel, Russel Lande, and Georgina M. Mace. 2010. 'Adaptation,  
534 Plasticity and Extinction in a Changing Environment: Towards a Predictive  
535 Theory'. Edited by Joel G Kingsolver. *PLoS Biology* 8 (4). Public Library of  
536 Science: 1–8.
- 537 Clements, Julia L. Blanchard, Kirsty L. Nash, Mark A. Hindell, and Arpat Ozgul. 2017.  
538 'Body Size Shifts and Early Warning Signals Precede the Historic Collapse of  
539 Whale Stocks'. *Nature Ecology & Evolution*. doi:10.1038/s41559-017-0188.
- 540 Clements, and Arpat Ozgul. 2016. 'Including Trait-Based Early Warning Signals Helps  
541 Predict Population Collapse'. *Nature Communications* 7: 10984.  
542 <http://www.nature.com/doi/10.1038/ncomms10984>.
- 543 Collette, B B, K E Carpenter, B A Polidoro, M J Juan-Jordá, A Boustany, D J Die, C Elfes,  
544 et al. 2011. 'High Value and Long Life - Double Jeopardy for Tunas and  
545 Billfishes'. *Science*. doi:10.1126/science.1208730.
- 546 Dai, L., D. Vorselen, K. S. Korolev, and J. Gore. 2012. 'Generic Indicators for Loss of  
547 Resilience Before a Tipping Point Leading to Population Collapse'. *Science* 336  
548 (6085): 1175–77. doi:10.1126/science.1219805.
- 549 Dai, Lei, Kirill S. Korolev, and Jeff Gore. 2013. 'Slower Recovery in Space before  
550 Collapse of Connected Populations'. *Nature*. doi:10.1038/nature12071.
- 551 Dakos, Vasilis, Marten Scheffer, Egbert H van Nes, Victor Brovkin, Vladimir  
552 Petoukhov, and Hermann Held. 2008. 'Slowing down as an Early Warning Signal  
553 for Abrupt Climate Change.' *Proceedings of the National Academy of Sciences of  
554 the United States of America* 105 (38): 14308–12.  
555 doi:10.1073/pnas.0802430105.
- 556 Drake, John M, and Blaine D Griffen. 2010. 'Early Warning Signals of Extinction in  
557 Deteriorating Environments.' *Nature* 467 (7314). Nature Publishing Group:  
558 456–59. doi:10.1038/nature09389.
- 559 Falconer, Douglas S, and Trudy F C Mackay. 1996. *Introduction to Quantitative  
560 Genetics (4th Edition)*. *Trends in Genetics*. Vol. 12.  
561 [http://www.amazon.com/Introduction-Quantitative-Genetics-Douglas-  
562 Falconer/dp/0582243025](http://www.amazon.com/Introduction-Quantitative-Genetics-Douglas-Falconer/dp/0582243025).
- 563 Frank, Kenneth T, Brian Petrie, Jonathan a D Fisher, and William C Leggett. 2011.  
564 'Transient Dynamics of an Altered Large Marine Ecosystem.' *Nature* 477 (7362):  
565 86–89. <http://www.ncbi.nlm.nih.gov/pubmed/21796120>.
- 566 García Molinos, Jorge, and Ian Donohue. 2011. 'Temporal Variability within  
567 Disturbance Events Regulates Their Effects on Natural Communities'. *Oecologia*.

- 568 doi:10.1007/s00442-011-1923-2.
- 569 Gavrillets, Sergey, and Samuel M Scheiner. 1993. 'The Genetics of Phenotypic of  
570 Reaction Norm Shape V . Evolution'. *Journal of Evolutionary Biology* 6 (1): 31–  
571 48. doi:10.1046/j.1420-9101.1993.6010031.x.
- 572 Ghalambor, C. K., J. K. McKay, S. P. Carroll, and D. N. Reznick. 2007. 'Adaptive versus  
573 Non-Adaptive Phenotypic Plasticity and the Potential for Contemporary  
574 Adaptation in New Environments'. *Functional Ecology*. doi:10.1111/j.1365-  
575 2435.2007.01283.x.
- 576 Gompertz, B. 1825. 'On the Nature and Function Expressive of the Law of Human  
577 Mortality, and on a New Mode of Determining the Value of Life Contingencies'.  
578 *Philosophical Transactions of the Royal Society of London* .
- 579 Gomulkiewicz, Richard, and Robert D Holt. 1995. 'When Does Evolution by Natural  
580 Selection Prevent Extinction?' *Evolution* 49 (1): 201–7.  
581 <http://www.jstor.org/stable/10.2307/2410305%5Cnpapers2://publication/uid/AF75FB13-CA45-471F-9595-604002DDAB20>.  
582
- 583 Gomulkiewicz, Richard, Stephen M. Krone, and Christopher H. Remien. 2017.  
584 'Evolution and the Duration of a Doomed Population'. *Evolutionary Applications*.  
585 doi:10.1111/eva.12467.
- 586 Gonzalez, Andrew, Ophélie Ronce, Regis Ferriere, and Michael E Hochberg. 2013.  
587 'Evolutionary Rescue: An Emerging Focus at the Intersection between Ecology  
588 and Evolution.' *Philosophical Transactions of the Royal Society of London. Series*  
589 *B, Biological Sciences* 368 (1610). The Royal Society: 20120404.  
590 doi:10.1098/rstb.2012.0404.
- 591 Hendry, Andrew P., Thomas J. Farrugia, and Michael T. Kinnison. 2008. 'Human  
592 Influences on Rates of Phenotypic Change in Wild Animal Populations'.  
593 *Molecular Ecology*. doi:10.1111/j.1365-294X.2007.03428.x.
- 594 Hilker, Frank M. 2010. 'Population Collapse to Extinction: The Catastrophic  
595 Combination of Parasitism and Allee Effect'. *Journal of Biological Dynamics* 4 (1).  
596 Taylor & Francis : 86–101. doi:10.1080/17513750903026429.
- 597 Hufbauer, Ruth A., Marianna Szűcs, Emily Kasyon, Courtney Youngberg, Michael J.  
598 Koontz, Christopher Richards, Ty Tuff, and Brett A. Melbourne. 2015. 'Three  
599 Types of Rescue Can Avert Extinction in a Changing Environment'. *Proceedings*  
600 *of the National Academy of Sciences*. doi:10.1073/pnas.1504732112.
- 601 Hutchings, Jeffrey A., Ransom A. Myers, Veronica B. García, Luis O. Lucifora, and Anna  
602 Kuperinen. 2012. 'Life-History Correlates of Extinction Risk and Recovery  
603 Potential'. *Ecological Applications*. doi:10.1890/11-1313.1.
- 604 Hutchings, Jeffrey A., and John D. Reynolds. 2004. 'Marine Fish Population Collapses:  
605 Consequences for Recovery and Extinction Risk'. *BioScience* 54 (4): 297–309.

- 606 <http://bioscience.oxfordjournals.org/cgi/doi/10.1641/0006->  
607 [3568\(2004\)054\[0297:MFPCCF\]2.0.CO;2.](http://bioscience.oxfordjournals.org/cgi/doi/10.1641/0006-3568(2004)054[0297:MFPCCF]2.0.CO;2)
- 608 Jackson, J B, M X Kirby, W H Berger, K a Bjorndal, L W Botsford, B J Bourque, R H  
609 Bradbury, et al. 2001. 'Historical Overfishing and the Recent Collapse of Coastal  
610 Ecosystems.' *Science (New York, N.Y.)*. doi:10.1126/science.1059199.
- 611 Juan-Jordá, M. J., I. Mosqueira, J. Freire, and N. K. Dulvy. 2015. 'Population Declines of  
612 Tuna and Relatives Depend on Their Speed of Life'. *Proceedings of the Royal*  
613 *Society B: Biological Sciences* 282 (1811): 20150322.  
614 doi:10.1098/rspb.2015.0322.
- 615 Kéfi, Sonia, Vasilis Dakos, Marten Scheffer, Egbert H. Van Nes, and Max Rietkerk.  
616 2013. 'Early Warning Signals Also Precede Non-Catastrophic Transitions'. *Oikos*  
617 122 (5). Wiley/Blackwell (10.1111): 641–48. doi:10.1111/j.1600-  
618 0706.2012.20838.x.
- 619 Kéfi, Sonia, Max Rietkerk, Concepción L Alados, Yolanda Pueyo, Vasilios P  
620 Papanastasis, Ahmed ElAich, Peter C de Ruiter, et al. 2007. 'Spatial Vegetation  
621 Patterns and Imminent Desertification in Mediterranean Arid Ecosystems'.  
622 *Nature*. doi:10.1038/nature06111.
- 623 Lane, Jeffrey E., Loeske E B Kruuk, Anne Charmantier, Jan O. Murie, and F. Stephen  
624 Dobson. 2012. 'Delayed Phenology and Reduced Fitness Associated with Climate  
625 Change in a Wild Hibernator'. *Nature*. doi:10.1038/nature11335.
- 626 May, Robert M. 1977. 'Thresholds and Breakpoints in Ecosystems with a Multiplicity  
627 of Stable States'. *Nature*. doi:10.1038/269471a0.
- 628 Olden, Julian D., Zeb S. Hogan, and M. Jake Vander Zanden. 2007. 'Small Fish, Big Fish,  
629 Red Fish, Blue Fish: Size-Biased Extinction Risk of the World's Freshwater and  
630 Marine Fishes'. *Global Ecology and Biogeography*. doi:10.1111/j.1466-  
631 8238.2007.00337.x.
- 632 Pigeon, Gabriel, Thomas H.G. Ezard, Marco Festa-Bianchet, David W. Coltman, and  
633 Fanie Pelletier. 2017. 'Fluctuating Effects of Genetic and Plastic Changes in Body  
634 Mass on Population Dynamics in a Large Herbivore'. *Ecology*.  
635 doi:10.1002/ecy.1940.
- 636 Reed, Thomas E, Robin S Waples, Daniel E Schindler, Jeffrey J Hard, and Michael T  
637 Kinnison. 2010. 'Phenotypic Plasticity and Population Viability: The Importance  
638 of Environmental Predictability.' *Proceedings. Biological Sciences / The Royal*  
639 *Society* 277 (1699): 3391–3400. doi:10.1098/rspb.2010.0771.
- 640 Scheffer, M., S. R. Carpenter, T. M. Lenton, J. Bascompte, W. Brock, V. Dakos, J. van de  
641 Koppel, et al. 2012. 'Anticipating Critical Transitions'. *Science* 338 (6105): 344–  
642 48. doi:10.1126/science.1225244.
- 643 Scheffer, Marten, Jordi Bascompte, William A. Brock, Victor Brovkin, Stephen R.

- 644 Carpenter, Vasilis Dakos, Hermann Held, Egbert H. van Nes, Max Rietkerk, and  
 645 George Sugihara. 2009. 'Early-Warning Signals for Critical Transitions.' *Nature*  
 646 461 (7260). Nature Publishing Group: 53–59. doi:10.1038/nature08227.
- 647 Sousa, Wayne P. 1984. 'The Role of Disturbance in Natural Communities'. *Annual*  
 648 *Review of Ecology & Systematics*.
- 649 Spanbauer, Trisha L, Craig R Allen, David G Angeler, Tarsha Eason, Sherilyn C Fritz,  
 650 Ahjond S Garmestani, Kirsty L Nash, Jeffery R Stone, Craig A Stow, and Shana M  
 651 Sundstrom. 2016. 'Body Size Distributions Signal a Regime Shift in a Lake  
 652 Ecosystem'. *Proceedings of the Royal Society B* 283: 20160249.  
 653 doi:http://dx.doi.org/10.1098/rspb.2016.0249.
- 654 Traill, L. W., S. Schindler, and T. Coulson. 2014. 'Demography, Not Inheritance, Drives  
 655 Phenotypic Change in Hunted Bighorn Sheep'. *Proceedings of the National*  
 656 *Academy of Sciences*. doi:10.1073/pnas.1407508111.
- 657 van Benthem, Koen J., Hannah Froy, Tim Coulson, Lowell L. Getz, Madan K. Oli, and  
 658 Arpat Ozgul. 2017. 'Trait–Demography Relationships Underlying Small Mammal  
 659 Population Fluctuations'. *Journal of Animal Ecology*. doi:10.1111/1365-  
 660 2656.12627.
- 661 van Nes, Egbert H, and Marten Scheffer. 2007. 'Slow Recovery from Perturbations as  
 662 a Generic Indicator of a Nearby Catastrophic Shift.' *The American Naturalist* 169  
 663 (6): 738–47. doi:10.1086/516845.
- 664 Wissel, C. 1984. 'A Universal Law of the Characteristic Return Time near Thresholds'.  
 665 *Oecologia* 65 (1): 101–7. doi:10.1007/BF00384470.
- 666 Woodward, Guy, Bo Ebenman, Mark Emmerson, Jose M. Montoya, Jens M. Olesen,  
 667 Alfredo Valido, and Philip H. Warren. 2005. 'Body Size in Ecological Networks'.  
 668 *Trends in Ecology and Evolution* 20 (7): 402–9. doi:10.1016/j.tree.2005.04.005.
- 669 Yvonne, Willi, and Ary A Hoffmann. 2009. 'Demographic Factors and Genetic  
 670 Variation Influence Population Persistence under Environmental Change'.  
 671 *Journal of Evolutionary Biology*.
- 672
- 673 List of tables and figures:

| <b>Parameters</b><br><b>/variables</b> | <b>Description</b> | <b>Value</b> |
|----------------------------------------|--------------------|--------------|
|                                        |                    |              |

|                           |                                                                                              |                                                                                                                  |
|---------------------------|----------------------------------------------------------------------------------------------|------------------------------------------------------------------------------------------------------------------|
| $N_t$                     | Abundance of the population at time $t$                                                      | ....                                                                                                             |
| $\bar{z}_t ; \bar{a}_t$   | Mean trait value at time $t$ ; mean breeding value at time $t$                               | ....                                                                                                             |
| $\sigma_z^2 ; \sigma_a^2$ | Variance of the mean trait; additive genetic variance or variance of the mean breeding value | [0.05, 0.08, 0.1, 0.2, 0.3, 0.4, 0.5, 0.6] ;<br>[0.05, 0.08, 0.1, 0.2, 0.3, 0.4, 0.5, 0.6]                       |
| $b$                       | Strength in phenotypic plasticity                                                            | 0.05, 0.1, 0.2, 0.3, 0.4, 0.5, 0.6                                                                               |
| $R_0$                     | Net reproductive rate                                                                        | 1.1, 1.15, 1.2, 1.25, 1.3, 1.35, 1.5                                                                             |
| $u_t$                     | Environmental cue at time $t$                                                                | Case 1: -0.0001<br><br>Case 2: $-\frac{B}{2} + \frac{B}{2} e^{-\left(\frac{t}{500}C+C\right)}$<br><br>where, C=4 |
| $\theta_t$                | Optimum trait at time $t$                                                                    | ....                                                                                                             |
| $w_z^2$                   | Width of the Gaussian stabilizing fitness function. A measure of the strength in selection   | 40                                                                                                               |
| $z_i, a_i$                | Trait value for an individual $i$ ; breeding                                                 | ....                                                                                                             |

|                       | value for an individual $i$                                                  |                        |
|-----------------------|------------------------------------------------------------------------------|------------------------|
| $\epsilon$            | Residual component or unexplained component of a trait $z$                   | 0                      |
| $\sigma_{\epsilon}^2$ | Variance in that residual component $\epsilon$                               | 0                      |
| $E_t$                 | External environmental value at time $t$                                     | ....                   |
| $B$                   | Coefficient that captures the strength in the external environmental change  | 2                      |
| $C$                   | Parameter that controls the rate of change in the external environment $E_t$ | Various: 10.5 to 120.5 |

674

675 Table 1: List of variables and parameter values used in the model. Note that  
 676 variables are not given any value, but parameters for which the model simulations  
 677 are tested are given values.

678

679

680

681

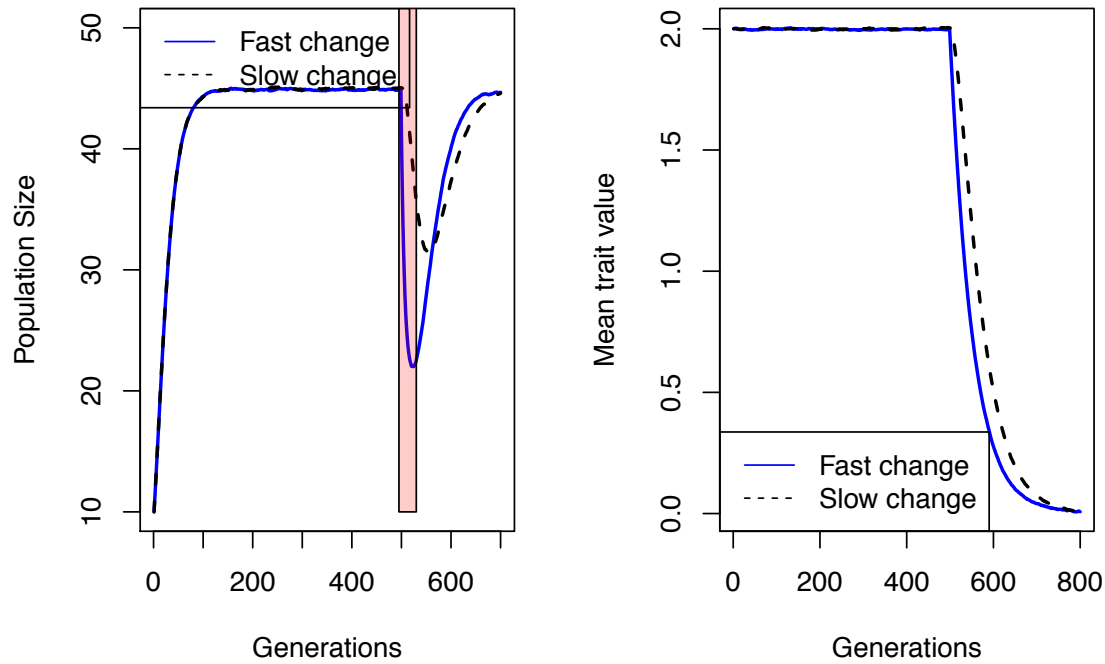

682

683 **Figure 1.** Population and trait dynamics under two different environmental scenarios. Left:

684 Population size declines by ~50%, when the optimum environment shifts fast ( $C=120.5$ ;

685 blue line), whereas during slow change ( $C=10.5$ ; dashed line) population declines but to a

686 lesser extent. Right: Trait dynamics during fast (blue line;  $C=120.5$ ) and slow (dashed line;

687  $C=10.5$ ) environmental change. Data based on deterministic simulations of the theoretical

688 model. Parameters used:  $\sigma_a^2 = 0.5$ ;  $R_0 = 1.2$ ;  $b = 0.2$ ;  $w_z^2 = 40$ .

689

690



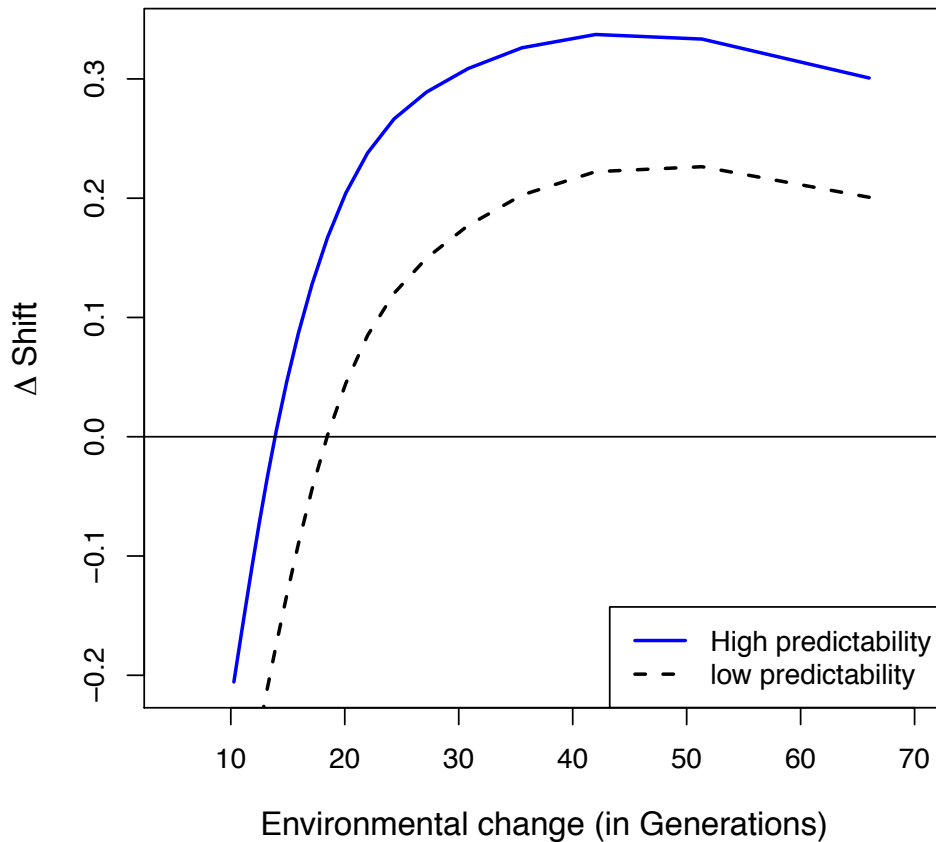

691

692 **Figure 2.** Effect of environmental predictability on the magnitude of  $\Delta shift$ , data from  
693 numerical simulations of the theoretical model.  $\Delta shift$  denotes how large and earlier the  
694 shift occurs in trait dynamics before a decline in the population. If  $\Delta shift$  is +ve, shift in  
695 average trait value precedes decline in population size and vice versa. The X-axis denotes  
696 the time in generations it takes for the optimum to change by a magnitude of 1.5 units, and  
697 hence 10 in the X-axis means the optimum shifts by a magnitude of 1.5 in 10 generations  
698 indicating a fast change and 60 means the optimum takes 60 generations to shift by a  
699 magnitude of 1.5 units indicating a very slow change. High environmental predictability  
700 (blue line) facilitates earlier occurrence of trait shift ( $\Delta shift$  being +ve) compared to when

701 the environmental predictability is very low (dashed line).  $\Delta shift$  is always -ve (which  
702 means population declines precede mean trait shifts) when the optimum environment shifts  
703 in less than or equal to 15 generations by 1.5 units. Parameters used:  $\sigma_a^2 = 0.5$ ;  $R_0 = 1.2$ ;  $b =$   
704  $0.2$ ;  $w_z^2 = 40$ .  
705

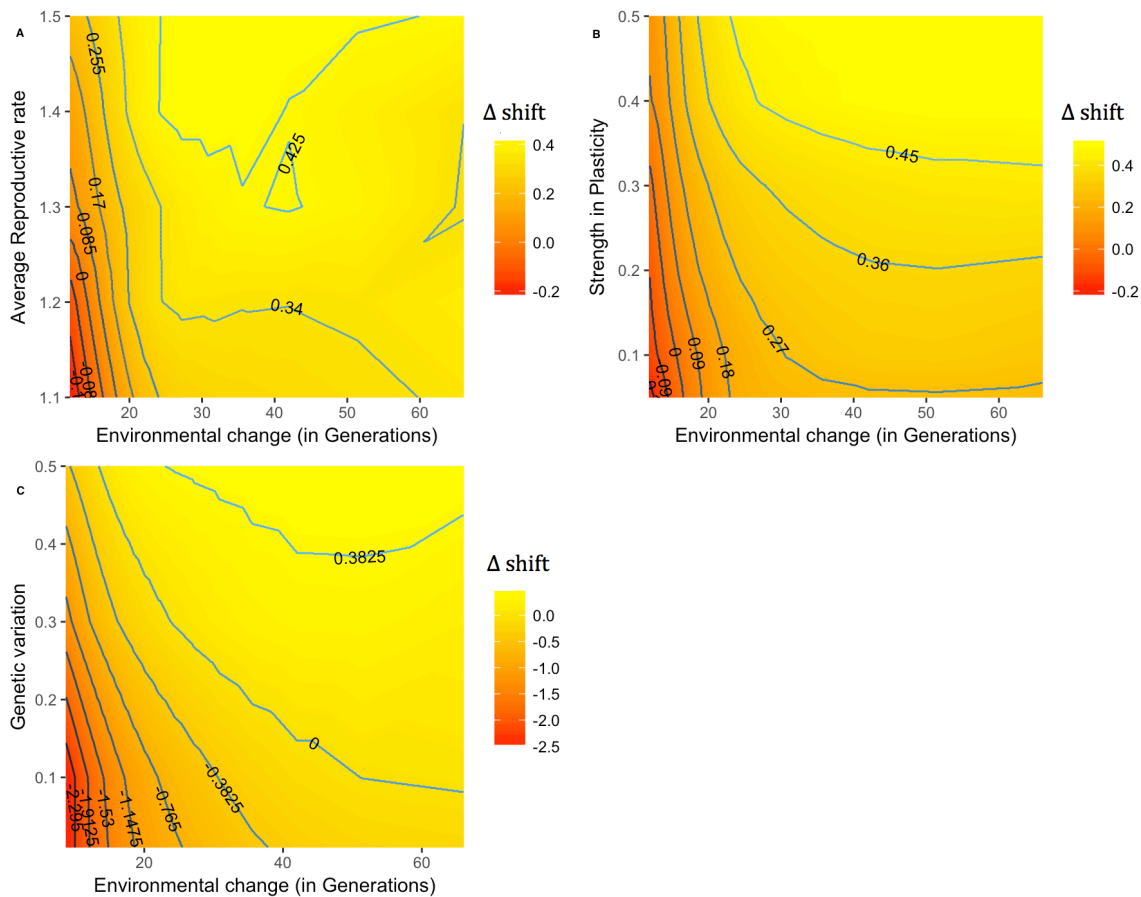

706  
707 **Figure 3.** Contour plot showing the effect of net reproductive rate, plasticity and genetic  
708 variation on  $\Delta shift$  (contour lines). Shown here are the results from numerical simulations  
709 of the theoretical model. For a trait shift to be informative of a population decline, the  $\Delta shift$   
710 should be always greater than zero (contour line =0). The X-axis denotes the time in  
711 generations it takes for the optimum to shift by a magnitude of 1.5 units.

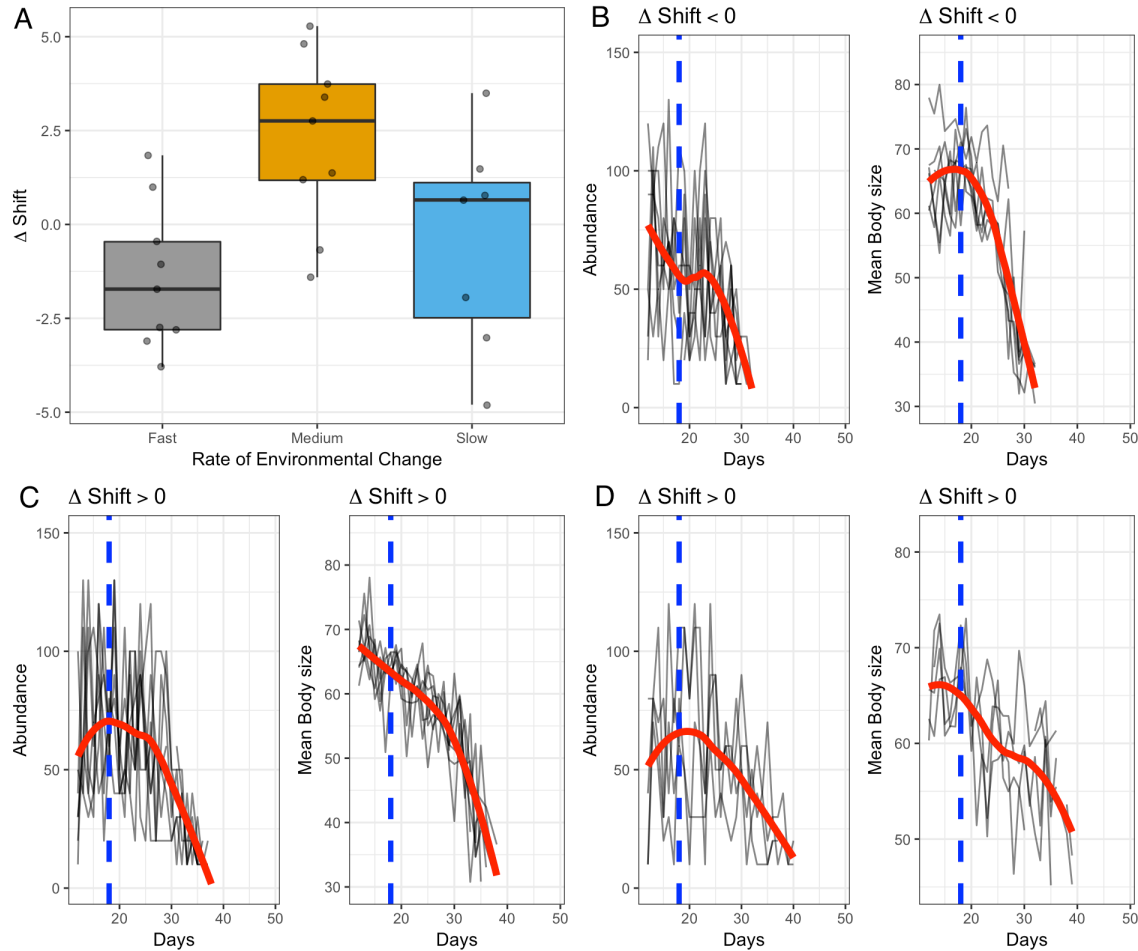

712

713 **Figure 4.** Ability of shift in body size dynamics to precede population decline (i.e.,  $\Delta shift > 0$ )  
714 under different environmental regimes, for the experimental data from Clements & Ozgul  
715 (2016). Note that  $\Delta shift < 0$  if population decline precedes shift in mean body size and  $\Delta shift$   
716  $> 0$  if shift in mean body size precedes population decline. (A)  $\Delta shift < 0$  for fast decline in  
717 prey availability indicating that population decline preceded shift in mean body size. For  
718 medium and slow decline in prey availability,  $\Delta shift$  was largely positive ( $\Delta shift > 0$ ). (B)  
719 Replicate abundance and body size time-series are shown for  $\Delta shift < 0$  (fast decline in prey  
720 availability) and for  $\Delta shift > 0$  (C and D) (Medium decline and slow decline in prey  
721 availability respectively). The blue dashed line in B, C and D indicates the starting point of  
722 environmental deterioration. The red line indicates *loess* smoothing across replicates.

723

724

725

726

727

728

729
